# Supplementary material
Source: PubMed Central journal article supplement (PMC3528088)
Supplement: Supp_Table1.pdf [file Supp_Table1.pdf]

## Supplementary Data

SUPPLEMENTARY TABLE S1. FULL DATA SET  
FROM SPAWNING EXPERIMENTS

| <i>Tank</i> | <i>Date</i>   | <i>Number<br/>pairs bred</i> | <i>% successful<br/>pairings</i> | <i>Average<br/>clutch size</i> |
|-------------|---------------|------------------------------|----------------------------------|--------------------------------|
| 20A         | 11/15/2011    | 10                           | 30                               | 73                             |
|             | 11/29/2011    | 10                           | 40                               | 122                            |
|             | 12/6/2011     | 10                           | 20                               | 55                             |
|             | 12/13/2011    | 10                           | 0                                | NA                             |
|             | 12/20/2011    | 10                           | 80                               | 165                            |
|             | Average       |                              | 34                               | 104                            |
| 20B         | 11/15/2011    | 10                           | 0                                | NA                             |
|             | 11/30/2011    | 10                           | 50                               | 145                            |
|             | 12/7/2011     | 10                           | 30                               | 89                             |
|             | 12/14/2011    | 10                           | 50                               | 111                            |
|             | 12/21/2011    | 10                           | 20                               | 76                             |
|             | Average       |                              | 30                               | 105                            |
| 20C         | 11/17/2011    | 10                           | 70                               | 106                            |
|             | 11/30/2011    | 10                           | 10                               | 200                            |
|             | 12/8/2011     | 10                           | 20                               | 140                            |
|             | 12/15/2011    | 10                           | 30                               | 76                             |
|             | 12/22/2011    | 10                           | 40                               | 134                            |
|             | Average       |                              | 34                               | 131                            |
|             | Average of 20 |                              | 33                               | 115                            |
| 29A         | 11/15/2011    | 14                           | 36                               | 123                            |
|             | 11/29/2011    | 14                           | 43                               | 103                            |
|             | 12/6/2011     | 14                           | 50                               | 126                            |
|             | 12/13/2011    | 14                           | 79                               | 81                             |
|             | 12/20/2011    | 14                           | 36                               | 284                            |
|             | Average       |                              | 49                               | 143                            |
| 29B         | 11/15/2011    | 14                           | 43                               | 197                            |
|             | 11/30/2011    | 14                           | 29                               | 171                            |
|             | 12/7/2011     | 14                           | 29                               | 167                            |
|             | 12/14/2011    | 14                           | 43                               | 113                            |
|             | 12/21/2011    | 14                           | 7                                | 240                            |
|             | Average       |                              | 30                               | 177                            |
| 29C         | 11/17/2011    | 14                           | 29                               | 94                             |
|             | 11/30/2011    | 14                           | 29                               | 180                            |
|             | 12/8/2011     | 14                           | 29                               | 122                            |
|             | 12/15/2011    | 14                           | 43                               | 103                            |
|             | 12/22/2011    | 14                           | 36                               | 143                            |
|             | Average       |                              | 33                               | 128                            |
|             | Average of 29 |                              | 37                               | 150                            |
